1 **Use of Transabdominal Ultrasound for the Detection of Intra-Peritoneal Tumor**  
2 **Engraftment and Growth in Mouse Xenografts of Epithelial Ovarian Cancer**

3  
4 Laura M. Chambers DO MS<sup>1\*</sup>  
5 Emily Esakov PhD<sup>2</sup>  
6 Chad Braley<sup>2</sup>  
7 Mariam AlHilli MD<sup>1</sup>  
8 Chad Michener MD<sup>1</sup>  
9 Ofer Reizes PhD<sup>2\*</sup>

10  
11 <sup>1</sup> Division of Gynecologic Oncology; Obstetrics, Gynecology and Women's Health  
12 Institute, Cleveland Clinic, Desk A81, 9500 Euclid Avenue, Cleveland, OH 44195

13  
14 <sup>2</sup> Department of Cardiovascular and Molecular Medicine, Lerner Research Institute,  
15 Cleveland Clinic, 9500 Euclid Avenue, Cleveland, OH 44195

16  
17 \* Corresponding Authors:

18 Laura M. Chambers, DO, MS; Email: [chambel2@ccf.org](mailto:chambel2@ccf.org) Telephone: +1(216) 212-2854  
19 Ofer Reizes, PhD; Email: [reizeso@ccf.org](mailto:reizeso@ccf.org) Telephone: +1(216) 215-0880

20

21

22

23

24

25

26

27

28

29

30

31

32

33

34

35

36

37

38

39

40

41

42

43

44

45

46 **Abstract**

47 Objective: To evaluate intraperitoneal (IP) tumor engraftment, metastasis and growth in  
48 a pre-clinical murine epithelial ovarian cancer (EOC) model using both transabdominal  
49 ultrasound (TAUS) and bioluminescence *in vivo* imaging system (IVIS).

50 Methods: Ten female C57Bl/6J mice at six weeks of age were included in this study. Five  
51 mice underwent IP injection of  $5 \times 10^6$  ID8-luc cells (+ D- luciferin) and the remaining five  
52 mice underwent IP injection of ID8-VEGF cells. Monitoring of tumor growth and ascites  
53 was performed weekly starting at seven days post-injection until study endpoint. ID8-luc  
54 mice were monitored using both TAUS and IVIS, and ID8-VEGF mice underwent TAUS  
55 monitoring only. Individual tumor implant dimension and total tumor volume were  
56 calculated. Average luminescent intensity was calculated and reported per mouse  
57 abdomen. Tumor detection was confirmed by gross evaluation and histopathology. All  
58 data are presented as mean +/- standard deviation.

59 Results: Overall, tumors were successfully detected in all ten mice using TAUS and IVIS,  
60 and tumor detection correlated with terminal endpoint histology/ H&E staining. For TAUS,  
61 the smallest confirmed tumor measurements were at seven days post-injection with mean  
62 long axis of 2.23mm and mean tumor volume of  $4.17 \text{mm}^3$ . However, IVIS imaging was  
63 able to detect tumor growth at 14 days post-injection.

64 Conclusions: TAUS is highly discriminatory for monitoring EOC in pre-clinical murine  
65 model, allowing for detection of tumor dimension as small as 2 mm and as early as seven  
66 days post-injection compared to IVUS. In addition, TAUS provides relevant information  
67 for ascites development and detection of multiple small metastatic tumor implants. TAUS

68 provides an accurate and reliable method to detect and monitor IP EOC growth in mouse  
69 xenografts.

70

## 71 **Introduction**

72 Epithelial ovarian cancer (EOC) is a leading cause of gynecologic cancer related  
73 mortality in women [1]. The five-year overall survival for women with EOC is poor since  
74 the majority of patients present with advanced and metastatic disease [2]. Additionally,  
75 although patients initially respond well to treatment with surgery and chemotherapy with  
76 carboplatin and paclitaxel, the vast majority of women will recur [4-8]. Ovarian carcinomas  
77 primarily undergo peritoneal dissemination, and are often associated with malignant  
78 ascites. This pattern of spread is associated with vague symptoms which leads to delays  
79 in diagnosis [3]. There is a significant unmet need for methods to facilitate early diagnosis  
80 of EOC and advance current therapeutic options.

81 Pre-clinical research utilizing EOC cell lines and patient-derived xenografts shows  
82 tremendous promise in advancing the current understanding of EOC carcinogenesis and  
83 therapeutics [9-15]. In longitudinal pre-clinical studies, the ability to detect tumor  
84 engraftment and sequentially assess tumor volume utilizing non-invasive techniques is  
85 essential to assessing tumor growth and treatment response. However, despite the  
86 existence of many cell lines that closely replicate human EOC at a cellular level, difficulty  
87 monitoring intraperitoneal tumor formation, growth and metastasis remains a major  
88 limitation in the execution of preclinical EOC studies [9-15].

89 In-vivo monitoring of EOC cell lines can be accomplished using several well-  
90 developed techniques including RFP, GFP, luciferase and ROSA reporter systems [16,

91 17]. Bioluminescence *in vivo* imaging system (IVIS) using luciferase reporter containing  
92 cell lines has been commonly utilized to track tumor growth over time, but this technique  
93 has limitations. This imaging technique involves injection of luciferin in conjunction with  
94 tumor cells, which is invasive and can initiate an inflammatory response [18]. Additionally,  
95 this technique only provides qualitative information regarding tumor progression [17]. The  
96 primary concern for use of IVIS is the necessity to use modified cell lines which have a  
97 tendency for genetic drift and phenotypic alterations. As such, use of IVIS for monitoring  
98 of patient-derived xenografts is not feasible [19,20]. In addition, a pertinent characteristic  
99 of EOC patients is the development of ascites throughout the progression of disease and  
100 the accuracy of luciferase is diminished in the presence of abdominal ascites as a result  
101 of dilution [21-24].

102 In clinical practice, transabdominal ultrasound (TAUS) is frequently utilized in the  
103 evaluation of women with gynecologic diseases, including EOC [25,26]. Despite being  
104 non-invasive, cost-effective and accurate, data for use of TAUS for monitoring of EOC in  
105 pre-clinical murine models is limited [27]. The objective of this study was to evaluate  
106 intraperitoneal tumor engraftment and growth in the presence and absence of ascites in  
107 a pre-clinical murine model of EOC utilizing both TAUS and IVIS imaging.

108

## 109 **Methods**

### 110 Cell Lines and Lentiviral Transformation of ID8 Cells with Luciferase Vector

111 ID8 and ID8-VEGF syngeneic EOC cell lines were cultured in Dulbecco Modified Eagle  
112 Medium (DMEM) media containing heat inactivated 5% FBS (Atlas Biologicals Cat # F-  
113 0500-D, Lot F31E18D1) and 100 U/mL penicillin-streptomycin and 1%

114 insulin/transferrin/selenium and grown under standard conditions. HEK 293T/17 (ATCC  
115 CRL-11268) cells were plated at 65 % confluence in a 100 mm dish and cultured in 9 mL  
116 DMEM supplemented with heat inactivated 10% FBS (Atlas Biologicals Cat # F-0500-D,  
117 Lot F31E18D1)[15]. ID8 cells were subsequently transfected with luciferase containing  
118 construct pHIV-Luciferase #21375 4.5 µg (Addgene) to generate the ID8-luc cells. Briefly,  
119 3 mL of the DMEM media was removed and ID8 cells were co-transfected with  
120 Lipofectamine 3000 (L3000015 Invitrogen) 35 µL of Plus reagent / 41 µL of Lipofectamine  
121 3000, 3rd generation packaging vectors pRSV-REV #12253 4.3 µg, pMDG.2 #12259 4.3  
122 µg, and pMDLg/pRRE #12251 4.3 µg (Addgene) and lentiviral vector directing expression  
123 of luciferase reporter pHIV-Luciferase #21375 4.5 µg (Addgene) in 3 mL of OptiMEM  
124 media. Following 8 hours of incubation, media of the 293T/T17 cultures was replaced and  
125 following 18 hours of incubation media containing viral particles were harvested and  
126 filtered through a 0.45 µm Durapore PVDF Membrane (Millipore SE1M003M00). Viral  
127 transfections were carried out over 72 hours ID8 parental cells and transduced cells were  
128 selected by their resistance to 2 µg/mL puromycin (MP Biomedicals 0219453910). Prior  
129 to use in this experiment, activity of luciferase promoter and tumor growth was confirmed  
130 in a pilot cohort of mice.

### 131 Study Approvals

132 All animal work throughout the study was completed and approved by the Institutional  
133 Animal Care and Use Committee (IACUC) (Protocol #2018-2003) of the Biological  
134 Resource Unit of The Cleveland Clinic Foundation Lerner Research Institute. Post  
135 tumor cell injection, mice were monitored weekly for signs of distress and humane  
136 endpoint was reached upon development of tumor burden  $>150\text{mm}^3$  (by ultrasound) or

137 debilitating ascites development as outlined in the above protocol, mice also reached  
138 humane endpoint if ruffled fur, reduced mobility, or hunched body posture was  
139 observed. Upon reaching humane endpoint criteria, mice were immediately euthanized  
140 by CO<sub>2</sub> asphyxiation and cervical dislocation. No animals were found dead before  
141 meeting endpoint criteria in this study. All researchers participating in animal studies  
142 were appropriately trained by veterinary technicians or skilled lab personnel following  
143 approved IACUC guidelines.

144 The surgical specimens used to generate the PDX model were obtained with permission  
145 from the Institutional Review Board of the Cleveland Clinic Foundation under IRB#18-062  
146 Gynecologic Oncology Tissue Collection. Per IRB#18-062 all specimens were collected  
147 after written informed consent was obtained from the patient. Tissue collected was frozen  
148 and stored and when available, live tissue procured to establish patient derived  
149 xenografts.

#### 150 Mouse Xenografts

151 Ten female C57Bl/6 mice were purchased from Jackson Laboratories (Bar Harbor, ME)  
152 at 6 weeks of age. After two weeks of acclimation, mice underwent IP injection of 300uL  
153 of either 5x10<sup>6</sup> ID8-luc (n=5) or ID8-VEGF (n=5) cells. All mice met endpoint criteria by  
154 58 days post cell injection and no mice were removed from the study prior to meeting  
155 endpoint criteria.

#### 156 Tumor Monitoring

157 Ultrasonography was performed using a Vevo2100 (VisualSonics) with an abdominal  
158 imaging package and MS550D probe (40Hz). TAUS surveillance was initiated seven days  
159 following IP tumor injection. TAUS was performed every seven days until study endpoint

160 at 67 days. Upon TAUS imaging, mice were also monitored for signs of obvious physical  
161 distress as outlined in the approved IACUC protocol. Mice were anesthetized using  
162 isoflurane (DRE Veterinary) and placed in the supine position. Following the removal of  
163 abdominal hair using Nair (Church & Dwight Co. Inc.), sterile ultrasound gel was applied  
164 to the abdomen. TAUS was performed using Vevo2100 (VisualSonics) using the  
165 abdominal imaging package and MS550D probe (40Hz) (Figure 5 - Supplemental). For  
166 each mouse, the abdomen was assessed for tumor in four quadrants. Tumors were noted  
167 to be absent or present at each assessment. Tumor dimensions (length and width) were  
168 recorded and tumor volume was calculated using the formula:  $(\text{Length} * (\text{Width}^2)) / 2$ .

#### 169 2D IVIS imaging.

170 Bioluminescence images were taken within 48 hours of ultrasound images with IVIS  
171 Lumina (PerkinElmer) using D-luciferin as previously described [24]. Mice received an IP  
172 injection of D-luciferin (Goldbio LUCK-1G, 150mg/kg in 150mL) under inhaled isoflurane  
173 anesthesia. Images were normalized (Living Image Software) with a minimum and  
174 maximum radiance of  $7.5810^5$  and  $5.3910^8$  photons/second/cm<sup>2</sup>/steradian, respectively.  
175 All images were obtained with a 15 second exposure. Average luminescent intensity in  
176 photons per second/cm<sup>2</sup>/steradian was calculated and reported for each mouse  
177 abdomen.

#### 178 3D IVIS Imaging.

179 Upon endpoint, bioluminescence and x-ray images were taken using the IVIS Spectrum  
180 system (PerkinElmer). Mice were sedated with 2% isoflurane (DRE Veterinary) inhalation  
181 in an airtight transparent anesthesia box for 5 minutes. Mice were shaved front and back  
182 and Nair was applied to remove remainder of the hair before being IP injected with D-

183 luciferin (Goldbio LUCK-1G, 150mg/kg in 150 mL). Mice are placed in a supine position  
184 on the light-tight chamber of the CCD camera imaging unit. Sequential images were  
185 acquired at 1min intervals (60 s exposure, no time delay) for at least 30 min. The  
186 luminescence camera was set to 60 s exposure, medium binning, f/1, blocked excitation  
187 filter, and open emission filter. The photographic camera was set to auto exposure,  
188 medium binning, and f/8. Average luminescent intensity in photons per  
189 second/cm<sup>2</sup>/steradian was calculated and reported for each mouse abdomen. Identical  
190 settings were used to acquire each image and region of interest during the  
191 study. Ultrasound and IVIS imaging were performed independently by two separate  
192 investigators who were blinded to the results of the other imaging modality.

### 193 Statistics

194 All data are presented as mean +/- standard deviation. Tumor volumes presented  
195 as mean+SEM and graphed over time. All statistical analysis was performed in GraphPad  
196 Prism v8.

### 197 **Results**

198 Tumor engraftment was detected in all C57Bl/6J via TAUS between 7-14 days,  
199 gross examination at necropsy and on histopathology. In addition, in mice injected with  
200 ID8-luc, tumor engraftment was noted at 14 days. In all cases, EOC tumors were detected  
201 before any clinical signs (ascites, palpable masses, lethargy). Beginning at Day 7 post-  
202 injection, TAUS was performed and a maximum of four tumor measurements were  
203 recorded per mouse in each abdominal quadrant. Six mice (60%) had one detectable  
204 tumor on TAUS at 7 days. All mice (n=10) had at least one tumor detectable on TAUS at



205 14 days post-injection and 20% (n=2) had two detectable tumors. Mean tumor dimensions  
 206 and volumes for ID8-luc and ID8-VEGF are displayed in Table 1 and Table 2, respectively.

207 **Table 1.**

|        | Transabdominal Ultrasound Measurement    |                                           |                                                     |                                                            | IVIS Imaging |                                   |
|--------|------------------------------------------|-------------------------------------------|-----------------------------------------------------|------------------------------------------------------------|--------------|-----------------------------------|
|        | Mean Tumor Implant Long Axis (mm) (n=20) | Mean Tumor Implant Short Axis (mm) (n=20) | Mean Tumor Implant Volume (mm <sup>3</sup> ) (n=20) | Mean Total Tumor Burden per Mouse (n=5) (mm <sup>3</sup> ) |              | photon/second/cm <sup>3</sup> /sr |
| Day 7  | 2.83                                     | 1.80                                      | 4.61                                                | 4.61                                                       | Day 7        | 2.63e6                            |
| Day 14 | 2.92                                     | 2.11                                      | 6.81                                                | 9.55                                                       | Day 14       | 1.11e6                            |
| Day 21 | 4.10                                     | 2.58                                      | 14.5                                                | 43.38                                                      | Day 24       | 4.15e6                            |
| Day 28 | 4.26                                     | 2.76                                      | 17.28                                               | 69.10                                                      | Day 31       | 4.88e6                            |
| Day 35 | 4.94                                     | 3.50                                      | 32.54                                               | 130.14                                                     | Day 39       | 7.75e6                            |
| Day 42 | 5.88                                     | 4.14                                      | 51.34                                               | 205.35                                                     | Day 46       | 1.95e <sup>7</sup>                |
| Day 49 | 7.20                                     | 4.58                                      | 75.58                                               | 305.53                                                     | Day 57       | 2.18e <sup>7</sup>                |
| Day 56 | 8.56                                     | 5.06                                      | 110.00                                              | 432.83                                                     |              |                                   |

208 **Table 2.**

|  | Transabdominal Ultrasound Measurement |
|--|---------------------------------------|
|--|---------------------------------------|

|        | Mean Tumor Implant Long Axis (mm) (n=20) | Mean Tumor Implant Short Axis (mm) (n=20) | Mean Tumor Implant Volume (mm <sup>3</sup> ) (n=20) | Mean Total Tumor Burden per Mouse (n=5) (mm <sup>3</sup> ) | Presence of Ascites |
|--------|------------------------------------------|-------------------------------------------|-----------------------------------------------------|------------------------------------------------------------|---------------------|
| Day 7  | 2.23                                     | 1.98                                      | 4.39                                                | 4.39                                                       | No                  |
| Day 14 | 3.00                                     | 1.90                                      | 5.56                                                | 6.79                                                       | No                  |
| Day 21 | 3.98                                     | 2.54                                      | 13.52                                               | 35.23                                                      | Yes                 |
| Day 28 | 4.30                                     | 2.70                                      | 16.73                                               | 49.92                                                      | Yes                 |
| Day 35 | 5.36                                     | 3.70                                      | 38.59                                               | 130.28                                                     | Yes                 |
| Day 42 | 6.55                                     | 4.03                                      | 56.09                                               | 178.81                                                     | Yes                 |

209

210 The smallest tumor short and long axis measurements detected at 7 days were  
211 1.74mm and 2.23mm, respectively. The lowest recorded tumor volume was 4.17mm.  
212 Ascites was detected as early as 21 days. Tumor volume detected via TAUS over time  
213 (method described in Supplemental Figure 1) is displayed for both ID8 and ID8 VEGF  
214 mice in Figure 1. Figure 2 depicts weekly TAUS images of EOC tumor implant over time  
215 in ID8-luc without ascites (A) and in ID8-VEGF (B).

216 Figure 1. TAUS Allows for Monitoring of Tumor Engraftment and Growth in Mice with  
217 Ovarian Cancer Xenografts of ID8 (A) and ID8-VEGF (B). Figures demonstrate  
218 average total tumor volume and weekly total tumor volume per individual animal (n=5).

219

220 Supplemental Figure 1. Procedural Steps for Transabdominal Ultrasound. Once the  
221 imaging unit is initialized, the warming plate and heart monitor are turned on (A). After  
222 induction of anesthesia with inhaled isoflurane, mice are placed in a supine position on  
223 the platform to monitor heart rate (B), and the abdominal fur is removed (C). Sterile  
224 ultrasound gel is then applied to the abdomen and TAUS performed using Vevo2100  
225 using the abdominal imaging package and MS550D probe (40Hz) (D). Once a tumor is  
226 identified (E), the image is captured and length and width are measured (F).

227

228 Figure 2. Transabdominal ultrasound demonstrating ability to monitor tumor implant  
229 .longitudinally in ID8-Luc (A) and ID8-VEGF (B) mice. Cyan colored caliper  
230 measurements can be observed at each time point which was utilized to monitor tumor  
231 volume.

232

233 Within 48 hours of TAUS, 2D IVIS imaging was performed. Tumor detection by 2D  
234 IVIS imaging was noted at 14 days post cell injection and intraperitoneal tumor growth  
235 over time was tracked as previously reported (Figure 3A, B). Additionally, 3D IVIS imaging  
236 including murine x-ray was performed at endpoint to determine tumor location (Figure  
237 3C).

238 Figure 3. 2D IVIS imaging tracked tumor growth over time, and 3D IVIS imaging  
239 determined endpoint tumor volume in ID8 tumor bearing C57Bl/6 mice. A. A  
240 representative time course of 2D IVIS imaging to track ID8 growth in C57Bl/6 mice. B.  
241 Graph depicting an average of ID8 tumor growth over time by fluorescence intensity

242 (n=5). C. Graph depicting individual ID8 tumor growth over time. D. An endpoint 3D IVIS  
243 depiction of tumor volume and location. \*p<0.05, \*\*p<0.01

244

245 Prior to necropsy, the murine abdominal cavity was imaged to confirm gross tumor  
246 presence in the ID8 and ID8 VEGF cohort. Each tumor was then excised and stained  
247 using H&E to confirm EOC histology (Figure 4). Following murine necropsy, ID8 tumors  
248 were imaged and excised (Figure 4). ID8 and ID8 VEGF EOC tumor phenotype was  
249 confirmed by histology (Figure 4A and B respectively).

250

251 Figure 4. Upon necropsy macroscopic and histologic EOC tumors were identified and  
252 validated for both ID8 and ID8 VEGF cell lines. A. Murine necropsy showing ID8 tumor  
253 mass (blue dotted circle), and resulting H&E stain confirming EOC pathology. B. Murine  
254 necropsy showing ID8 VEGF tumor mass (blue dotted circle), and resulting H&E stain  
255 confirming EOC pathology.

256

257 Additionally, to test whether TAUS can be used to detect PDX tumors, we injected mice  
258 with a PDX single cell suspension of EOC human cells. We were able to detect tumor  
259 growth at 10 days post injection (Figure 5).

260

261 Figure 5. Human derived EOC PDX tumor detected at 10 days post IP injection (A).

262

263 **Discussion**

264 Mouse xenografts represent an important method to pursue urgently needed  
265 preclinical studies to understand pathogenesis and develop new therapies for EOC. While  
266 many orthotopic models exist that closely mirror human EOC, techniques to monitor  
267 intraperitoneal tumors in an accurate, non-invasive fashion are limited. In this study, we  
268 applied ultrasonography, to evaluate the engraftment and growth of EOC in a pre-clinical  
269 model. We demonstrated that in murine models of EOC, TAUS can be used to accurately  
270 detect and monitor the growth of EOC xenografts with tumors and ascites detected as  
271 early as 7 and 21 days post-injection, respectively. We found TAUS is more sensitive for  
272 detection of disease progression compared to bioluminescence assays where tumor  
273 detection first occurred at 14 days post-injection.

274 Currently utilized and previously described strategies for tumor monitoring in  
275 murine models of EOC fall short [9-15, 21-24]. IVIS imaging is frequently used for tumor  
276 assessment in murine models of EOC but has significant limitations. First, the cell-line  
277 must contain a luciferase reporter, which limits the ability to utilize high fidelity patient-  
278 derived tumor graft models. Second, concerns exist regarding initiation of an inflammatory  
279 response or other phenotypic and genotypic alterations that may render the cell line less  
280 applicable to human EOC [19-21, 23]. Finally, detection of ascites is compromised in IVIS  
281 models. Baert et al demonstrated that reduced sensitivity of IVIS in the presence of  
282 luciferase with a significantly decreased in the presence of ascites within an ID8-luc model  
283 [23]. As the majority of human and mouse EOC lines have a penchant for ascites  
284 development, the detection of ascites is of high importance. In the clinical setting, ascites  
285 significantly impacts patient quality of life and is a harbinger of advanced, progressive

286 disease. Ascites is important to study in pre-clinical translational models as it can yield  
287 diagnostic and prognostic information.

288 In clinical practice, TAUS is frequently utilized in the evaluation of women with  
289 gynecologic diseases, including EOC [25, 26]. However, prior to this study, application of  
290 ultrasonography to murine pre-clinical EOC models has been limited. Weroha et al.  
291 utilized ultrasonography to assess tumor growth in patient-derived xenografts of EOC with  
292 high correlation between ultrasound assessment and tumor measurements at necropsy  
293 [27]. In addition, TAUS has been utilized in pre-clinical models of non-gynecologic intra-  
294 abdominal cancers, including pancreatic and genitourinary malignancies [28-30]. Within  
295 a murine model of bladder cancer, Patel et al. demonstrated high correlation between  
296 tumor size with transabdominal micro-ultrasound and at necropsy and were able to detect  
297 tumors as small as 0.95 mm<sup>3</sup> [30]. Similarly, in pre-clinical murine models of pancreatic  
298 adenocarcinoma, intra-pancreatic tumors were detected as early as three days post-  
299 injection, and tumor metastasis in addition to ascites was identified in all animals at two  
300 weeks with excellent correlation between tumor volume and [29].

301 TAUS offers several potential advantages over currently available imaging tools  
302 for the monitoring of murine models of EOC. Primarily, we demonstrate in this study that  
303 tumor detection can be assessed as early as one week post-injection, with tumor implants  
304 detected as small as 2mm in longest dimension. Secondly, malignant ascites and  
305 innumerable tumor implants are pathognomonic of human EOC. This method allows  
306 researchers to monitor treatment response via tumor volume and ascites in parallel to  
307 patients undergoing chemotherapy where radiologic scoring systems such as RECIST  
308 criteria are used. In addition, TAUS can be utilized for EOC monitoring in cell lines that

309 do not have RFP, GFP, luciferase or ROSA reporter systems. Thereby, this allows for in-  
310 vivo monitoring of any intra-peritoneal EOC cell line with or without ascites development,  
311 including PDX models. This is important because it allows researchers to follow tumor  
312 growth and treatment response over time with cells transplanted directly from patient  
313 tumor specimens without the need for luciferase transduction. Finally, the ability to  
314 accurately detect tumors may represent a strategy to minimize animal euthanasia, as  
315 their disease burden can be monitored in-vivo to end-point during an experiment without  
316 need for early necropsy with each animal serving as its own control. Therefore, monitoring  
317 EOC growth and response via TAUS has improved detection, higher sensitivity and  
318 increased breadth and utility over presently utilized imaging techniques.

319 In clinical practice, transabdominal and transvaginal US remain gold-standard for  
320 the initial assessment of gynecologic pathology, including ovarian tumors. TAUS is non-  
321 invasive and cost-effective with low risk to the patient. In this study, we demonstrate that  
322 this same imaging modality can be applied to mouse xenografts. Based on these results,  
323 we have adopted TAUS as a method to monitor tumor growth and treatment response in  
324 EOC preclinical studies in both syngeneic and PDX models with excellent success and  
325 reproducibility. One limitation of this model is the need for mouse anesthesia during  
326 TAUS. In this series, anesthesia and TAUS were well tolerated by the mice with no  
327 adverse intra-anesthesia events or mortalities related to the procedure. Despite this, to  
328 the best of our knowledge, this study represents the first publication assessing the  
329 feasibility of TAUS for preclinical murine models of EOC in parallel with IVIS imaging.

330 In conclusion, TAUS shows promise in the detection of tumor growth and  
331 metastasis and response to therapies in intraperitoneal mouse xenografts of EOC. TAUS

332 allows for detailed measurements of tumors and metastatic implants, ascites and is more  
333 sensitive than IVIS imaging.

334

335 **Author Contributions:** Chambers and Reizes were responsible for the conception and  
336 planning of the study. Chambers, Esakov, Braley, Michener, AlHilli and Reizes  
337 participated in study design. Chambers, Esakov, Braley performed data collection and  
338 management. Chambers, Esakov and Reizes designed and performed the data analysis.  
339 Chambers and Esakov drafted the manuscript. All authors critically revised the  
340 manuscript and all authors approved the manuscript in its final version for publication.

341 **Conflict of interest statement:** All authors have no relevant conflicts of interest to  
342 disclose.

343

344

345

346

347

348

349

350

351

352

353 **References**



- 354 [1] Siegel, R.L., Miller, K.D., Jemal, A., Cancer statistics, 2019, CA Cancer.J.Clin. 69  
355 (2019) 7-34
- 356 [2] Heintz AP, Odicino F, Maisonneuve P, Quinn MA, Benedet JL, Creasman WT, et al.  
357 Carcinoma of the ovary. FIGO 26th Annual Report on the Results of Treatment in  
358 Gynecological Cancer. Int J Gynaecol Obstet. 2006 Nov;95 Suppl 1:S161-92.
- 359 [3] Lengyel, E. (2010). Ovarian Cancer Development and Metastasis. The American  
360 Journal of Pathology, 177(3), 1053–1064.
- 361 [4] Heintz AP, Odicino F, Maisonneuve P, Quinn MA, Benedet JL, Creasman WT, et al.  
362 Carcinoma of the ovary. FIGO 26th Annual Report on the Results of Treatment in  
363 Gynecological Cancer. Int J Gynaecol Obstet. 2006 Nov;95 Suppl 1:S161-92.
- 364 [5] Bian C, Yao K, Li L, Yi T, Zhao X. Primary debulking surgery vs. neoadjuvant  
365 chemotherapy followed by interval debulking surgery for patients with advanced ovarian  
366 cancer. Arch Gynecol Obstet. 2016 Jan;293(1):163-8.
- 367 [6] Kehoe S, Hook J, Nankivell M, Jayson GC, Kitchener H, Lopes T, et al. Primary  
368 chemotherapy versus primary surgery for newly diagnosed advanced ovarian cancer  
369 (CHORUS): an open-label, randomised, controlled, non-inferiority trial. Lancet. 2015 Jul  
370 18;386(9990):249-57.
- 371 [7] Morrison J, Haldar K, Kehoe S, Lawrie TA. Chemotherapy versus surgery for initial  
372 treatment in advanced ovarian epithelial cancer. Cochrane Database Syst Rev. 2012 Aug  
373 15;(8):CD005343. doi(8):CD005343
- 374 [8] Pignata S, Scambia G, Katsaros D, Gallo C, Pujade-Lauraine E, De Placido S, et al.  
375 Carboplatin plus paclitaxel once a week versus every 3 weeks in patients with advanced

- 376 ovarian cancer (MITO-7): a randomised, multicentre, open-label, phase 3 trial. *Lancet*  
377 *Oncol.* 2014 Apr;15(4):396-405.
- 378 [9] Shaw, T. J., Senterman, M. K., Dawson, K., Crane, C. A., & Vanderhyden, B. C.  
379 (2004). Characterization of intraperitoneal, orthotopic, and metastatic xenograft models  
380 of human ovarian cancer. *Molecular Therapy*, 10(6), 1032–1042.
- 381 [10] Hernandez, L., Kim, M. K., Lyle, L. T., Bunch, K. P., House, C. D., Ning, F., ...  
382 Annunziata, C. M. (2016). Characterization of ovarian cancer cell lines as in vivo models  
383 for preclinical studies. *Gynecologic Oncology*, 142(2), 332–340.
- 384 [11] Mitra, A. K., Davis, D. A., Tomar, S., Roy, L., Gurler, H., Xie, J., ... Burdette, J. E.  
385 (2015). In vivo tumor growth of high-grade serous ovarian cancer cell lines. *Gynecologic*  
386 *Oncology*, 138(2), 372–377.
- 387 [12] Elias, K. M., Emori, M. M., Papp, E., MacDuffie, E., Konecny, G. E., Velculescu, V.  
388 E., & Drapkin, R. (2015). Beyond genomics: Critical evaluation of cell line utility for ovarian  
389 cancer research. *Gynecologic Oncology*, 139(1), 97–103.
- 390 [13] Lengyel, E., Burdette, J. E., Kenny, H. A., Matei, D., Pilrose, J., Haluska, P., ... Stack,  
391 M. S. (2013). Epithelial ovarian cancer experimental models. *Oncogene*, 33(28), 3619–  
392 3633.
- 393 [14] Roby, K. F., Taylor, C. C., Sweetwood, J. P., Cheng, Y., Pace, J. L., Tawfik, O., ...  
394 Terranova, P. F. (2000). Development of a syngeneic mouse model for events related to  
395 ovarian cancer. *Carcinogenesis*, 21(4), 585–591. doi:10.1093/carcin/21.4.585
- 396 [15] Janat-Amsbury MM, Yockman JW, Anderson ML, Kieback DG, Kim SW. Comparison  
397 of ID8 MOSE and VEGF-modified ID8 cell lines in an immunocompetent animal model  
398 for human ovarian cancer. *Anticancer Res.* 2006 Jul-Aug;26(4B):2785-9.

- 399 [16] Wilson AL, Wilson KL, Bilandzic M, et al. Non-Invasive Fluorescent Monitoring of  
400 Ovarian Cancer in an Immunocompetent Mouse Model. *Cancers (Basel)*. 2018;11(1):32.  
401 Published 2018 Dec 31.
- 402 [17] Validity of bioluminescence measurements for noninvasive in vivo imaging of tumor  
403 load in small animals. Klerk CP, Overmeer RM, Niers TM, Versteeg HH, Richel DJ, Buckle  
404 T, Van Noorden CJ, van Tellingen O *Biotechniques*. 2007 Jul; 43(1 Suppl):7-13, 30.
- 405 [18] Baklaushev, V.P., Kilpeläinen, A., Petkov, S. et al. Luciferase Expression Allows  
406 Bioluminescence Imaging But Imposes Limitations on the Orthotopic Mouse (4T1) Model  
407 of Breast Cancer. *Sci Rep* 7, 7715 (2017).
- 408 [19] A. Neri, G.L. Nicolson Phenotypic drift of metastatic and cell-surface properties of  
409 mammary adenocarcinoma cell clones during growth in vitro *Int. J. Cancer*, 28 (1981), pp.  
410 731-738
- 411 [20] Oxidative stress in cell culture: an under-appreciated problem? *FEBS Lett.*, 540  
412 (2003), pp. 3-6
- 413 [21] Liao, J. B., Ovenell, K. J., Curtis, E. E. M., Cecil, D. L., Koehnlein, M. R., Rastetter,  
414 L. R., ... Disis, M. L. (2015). Preservation of tumor-host immune interactions with  
415 luciferase-tagged imaging in a murine model of ovarian cancer. *Journal for*  
416 *ImmunoTherapy of Cancer*, 3(1).
- 417 [22] Kipps E, Tan DS, Kaye SB. Meeting the challenge of ascites in ovarian cancer: new  
418 avenues for therapy and research. *Nat Rev Cancer*. 2013;13(4):273–282.
- 419 [23] Baert, T., Verschuere, T., Van Hoylandt, A., Gijsbers, R., Vergote, I., & Coosemans,  
420 A. (2015). The dark side of ID8-Luc2: pitfalls for luciferase tagged murine models for

421 ovarian cancer. *Journal for ImmunoTherapy of Cancer*, 3(1). doi:10.1186/s40425-015-  
422 0102-0

423 [24] Toyoshima, M., Tanaka, Y., Matumoto, M., Yamazaki, M., Nagase, S., Sugamura,  
424 K., Yaegashi, N., Generation of a syngeneic mouse model to study the intraperitoneal  
425 dissemination of ovarian cancer with in vivo luciferase imaging, *Luminescence*. 24 (2009)  
426 324-331

427 [25] Brown, D. L., Doubilet, P. M., Miller, F. H., Frates, M. C., Laing, F. C., DiSalvo, D. N.,  
428 ... Lerner, M. H. (1998). Benign and malignant ovarian masses: selection of the most  
429 discriminating gray-scale and Doppler sonographic features. *Radiology*, 208(1), 103–110.

430 [26] Ladegaard Baun, M.L., Falborg, A.Z., Hjertholm, P., Petersen, L.K., Vedsted, P.,  
431 Ovarian cancer stage, variation in transvaginal ultrasound examination rates and the  
432 impact of an urgent referral pathway: A national ecological cohort study, *Acta*  
433 *Obstet.Gynecol.Scand.* 98 (2019) 1540-1548

434 [27] Weroha, S.J., Becker, M.A., Enderica-Gonzalez, S., Harrington, S.C., Oberg, A.L.,  
435 Maurer, M.J., Perkins, S.E., AlHilli, M., Butler, K.A., McKinstry, S., Fink, S., Jenkins,  
436 R.B., Hou, X., Kalli, K.R., Goodman, K.M., Sarkaria, J.N., Karlan, B.Y., Kumar, A.,  
437 Kaufmann, S.H., Hartmann, L.C., Haluska, P., Tumorgrafts as in vivo surrogates for  
438 women with ovarian cancer, *Clin.Cancer Res.* 20 (2014) 1288-1297

439 [28] Snyder, C.S., Kaushal, S., Kono, Y., Tran Cao, H.S., Hoffman, R.M., Bouvet, M.,  
440 Complementarity of ultrasound and fluorescence imaging in an orthotopic mouse model  
441 of pancreatic cancer, *BMC Cancer*. 9 (2009) 106-2407-9-106

442 [29] Ziske, C., Tiemann, K., Schmidt, T., Nagaraj, S., Marten, A., Schmitz, V.,  
443 Clarenbach, R., Sauerbruch, T., Schmidt-Wolf, I.G., Real-time high-resolution

444 compound imaging allows percutaneous initiation and surveillance in an orthotopic  
445 murine pancreatic cancer model, *Pancreas*. 36 (2008) 146-152  
446 [30] Patel, A.R., Chan, E.S., Hansel, D.E., Powell, C.T., Heston, W.D., Larchian, W.A.,  
447 Transabdominal micro-ultrasound imaging of bladder cancer in a mouse model: a  
448 validation study, *Urology*. 75 (2010) 799-804

A.

ID8 Average  
Tumor Volume

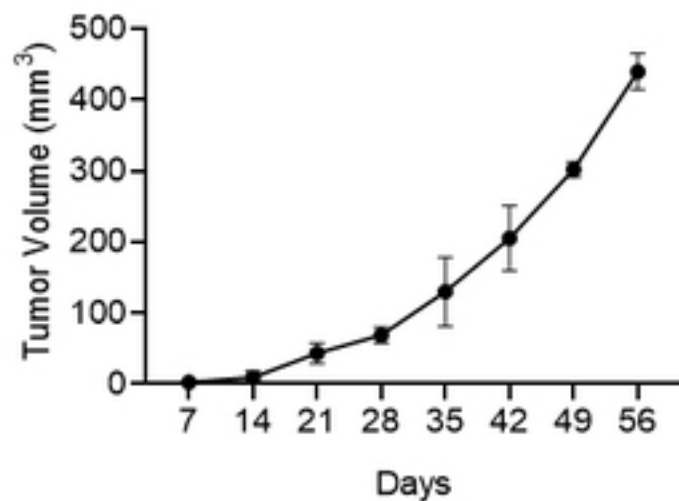

ID8 Individual  
Tumor Volume

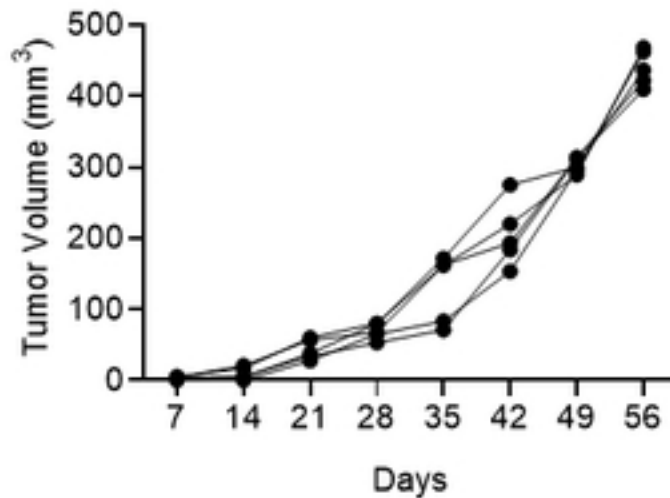

B.

ID8VEGF Average  
Tumor Volume

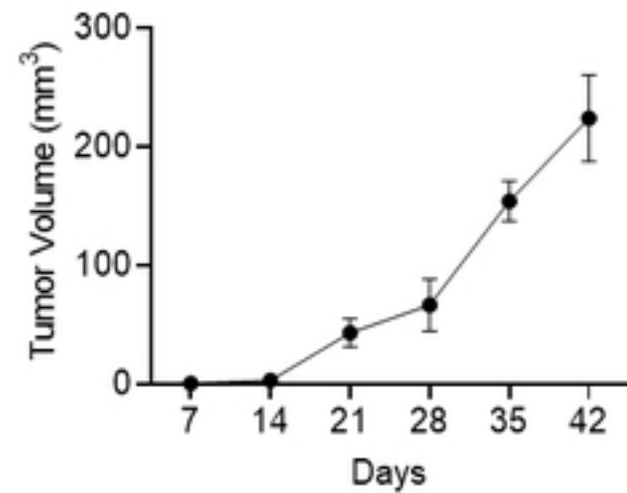

ID8 VEGF Individual  
Tumor Volume

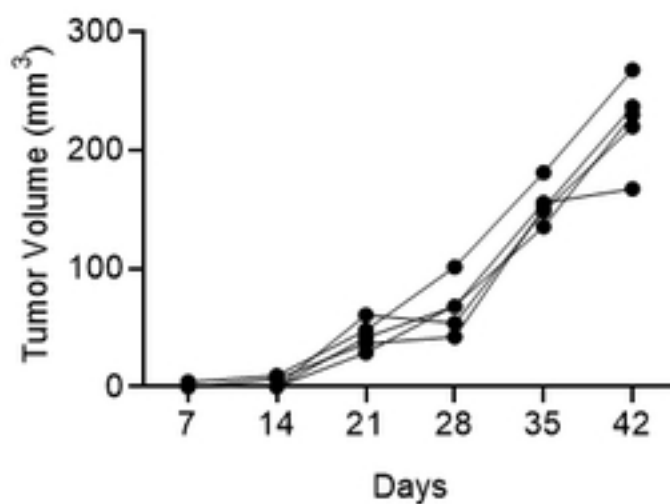

Figure 1

A.

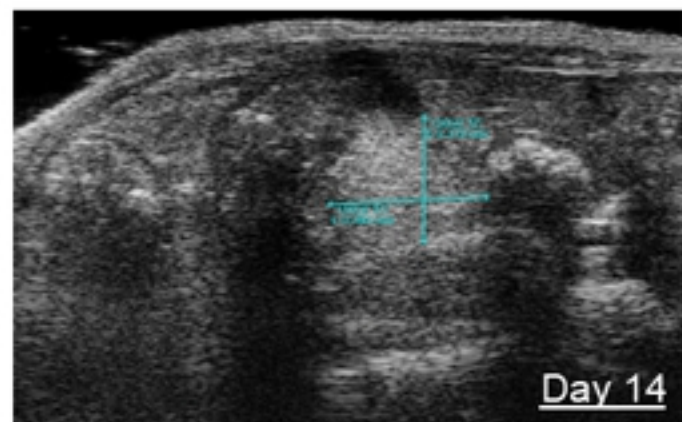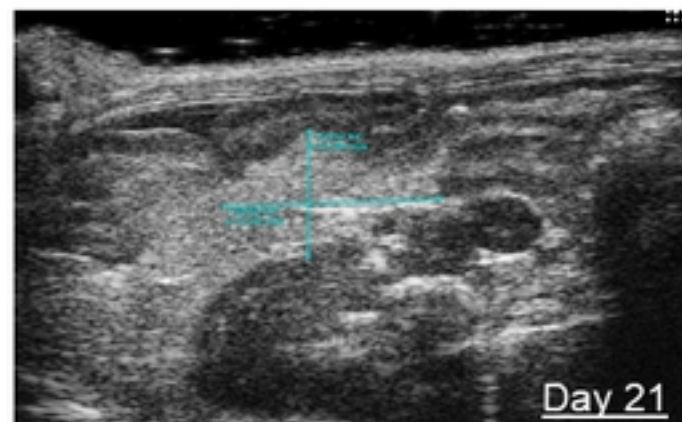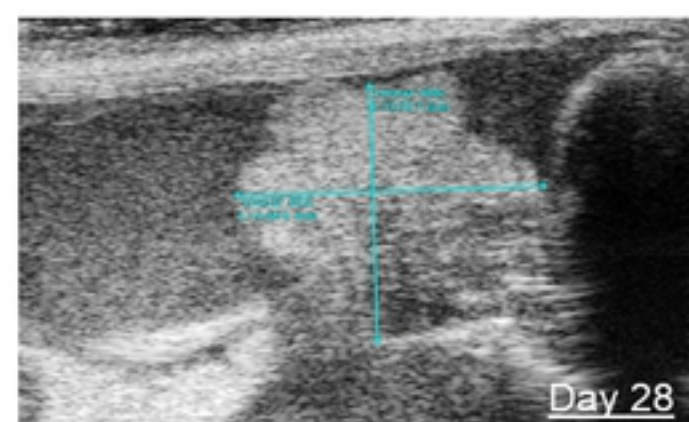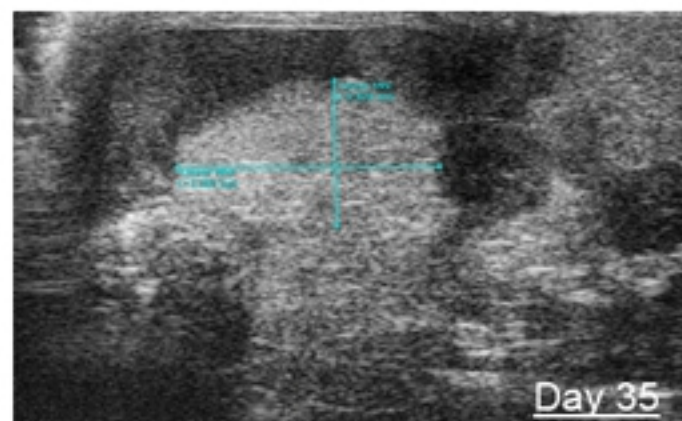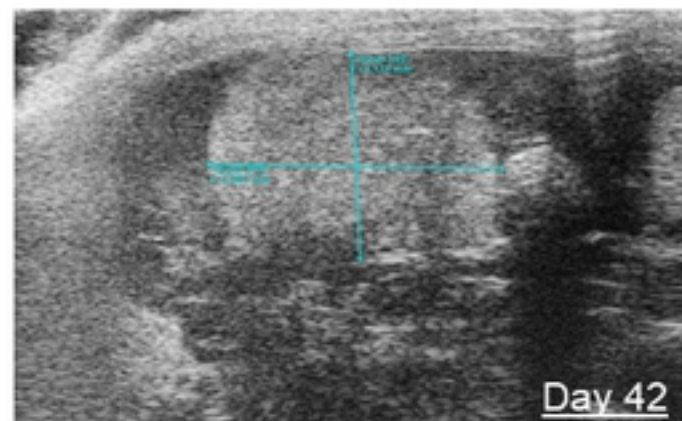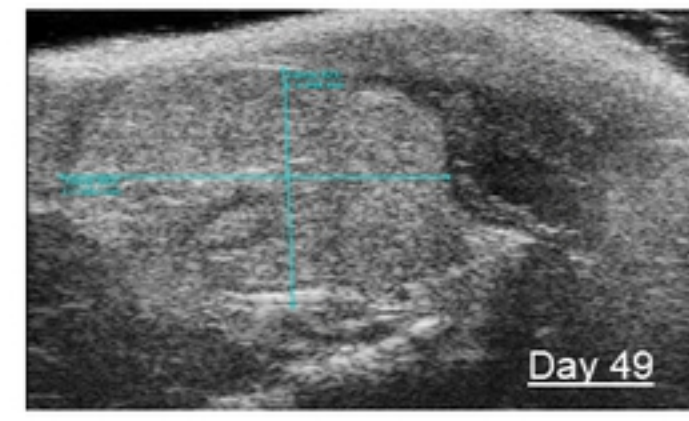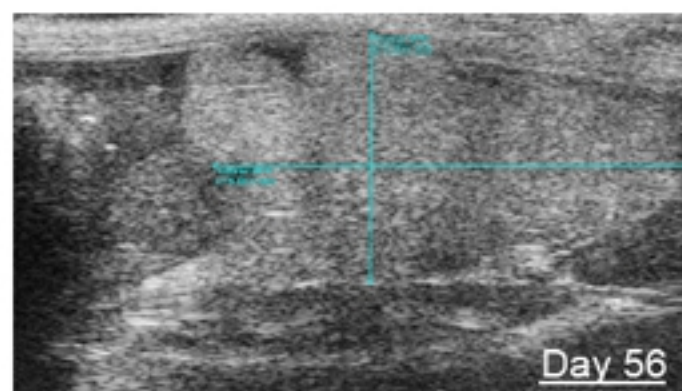

Figure 2A

B.

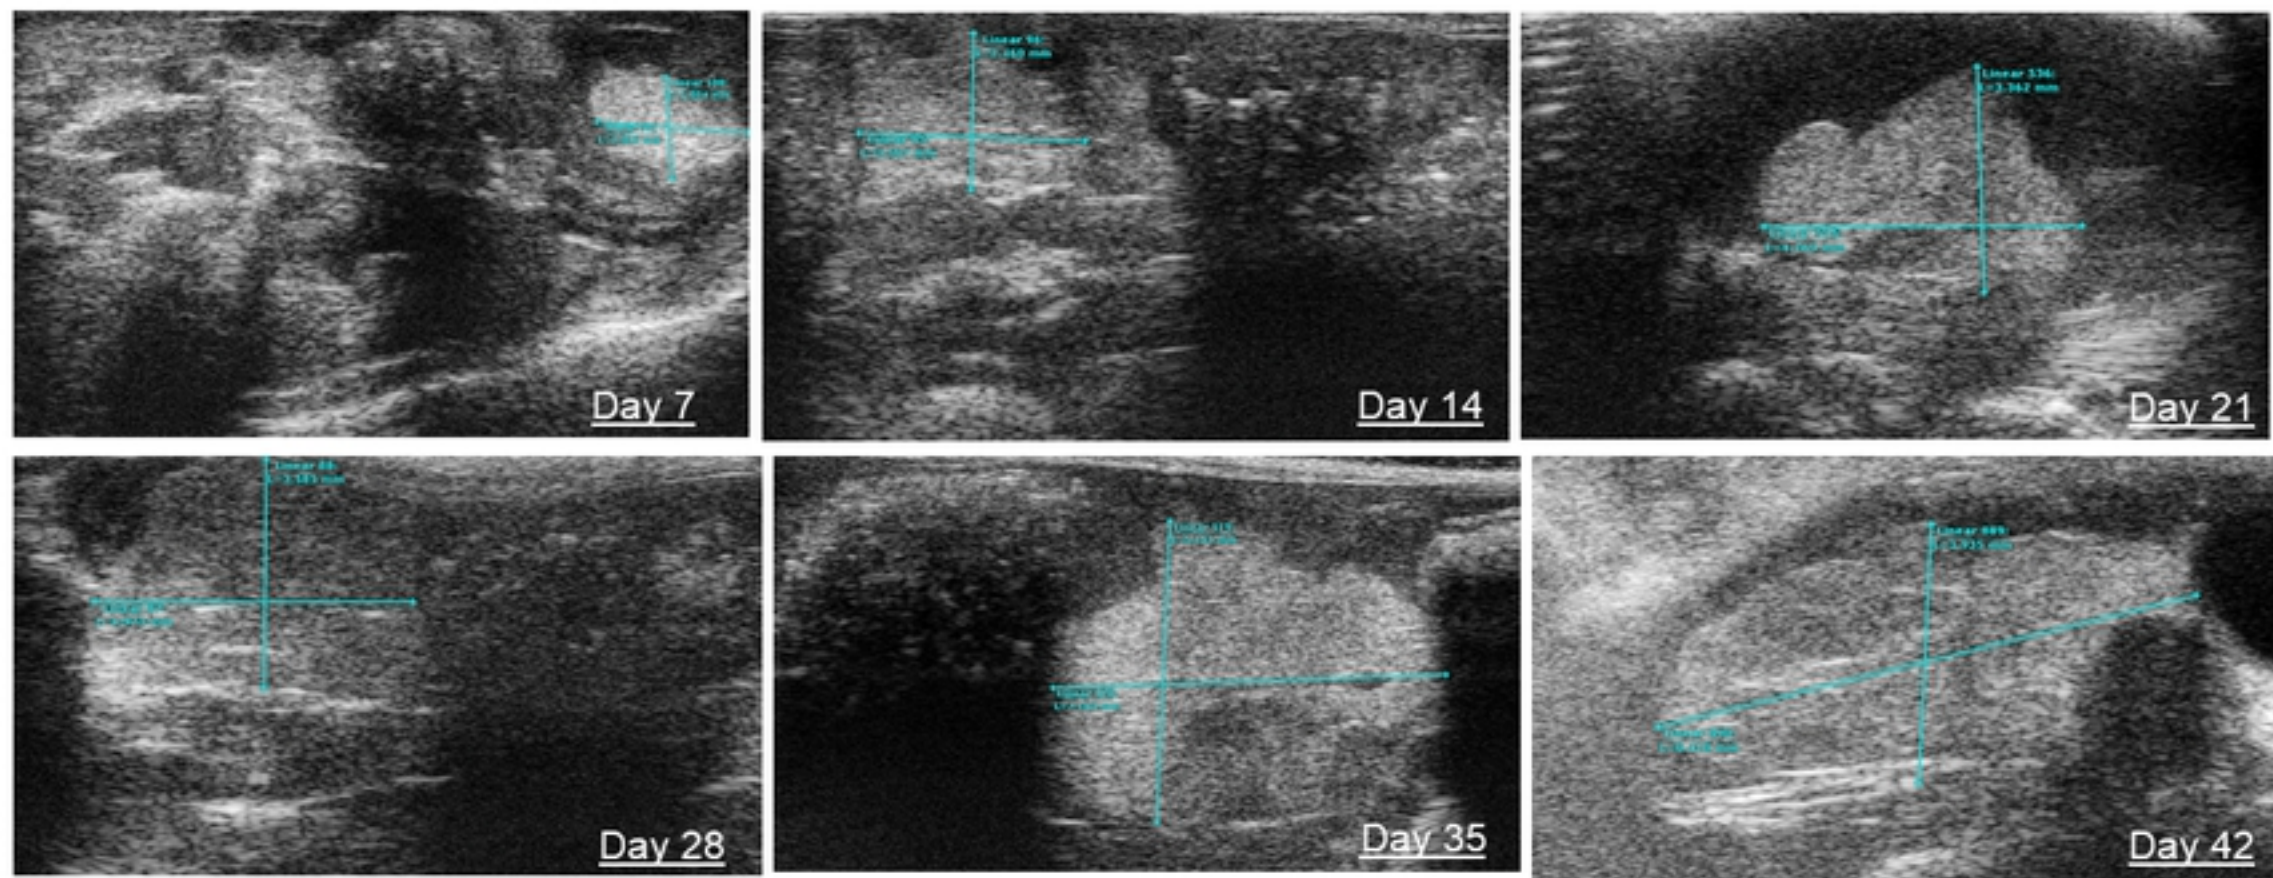

Figure 2B



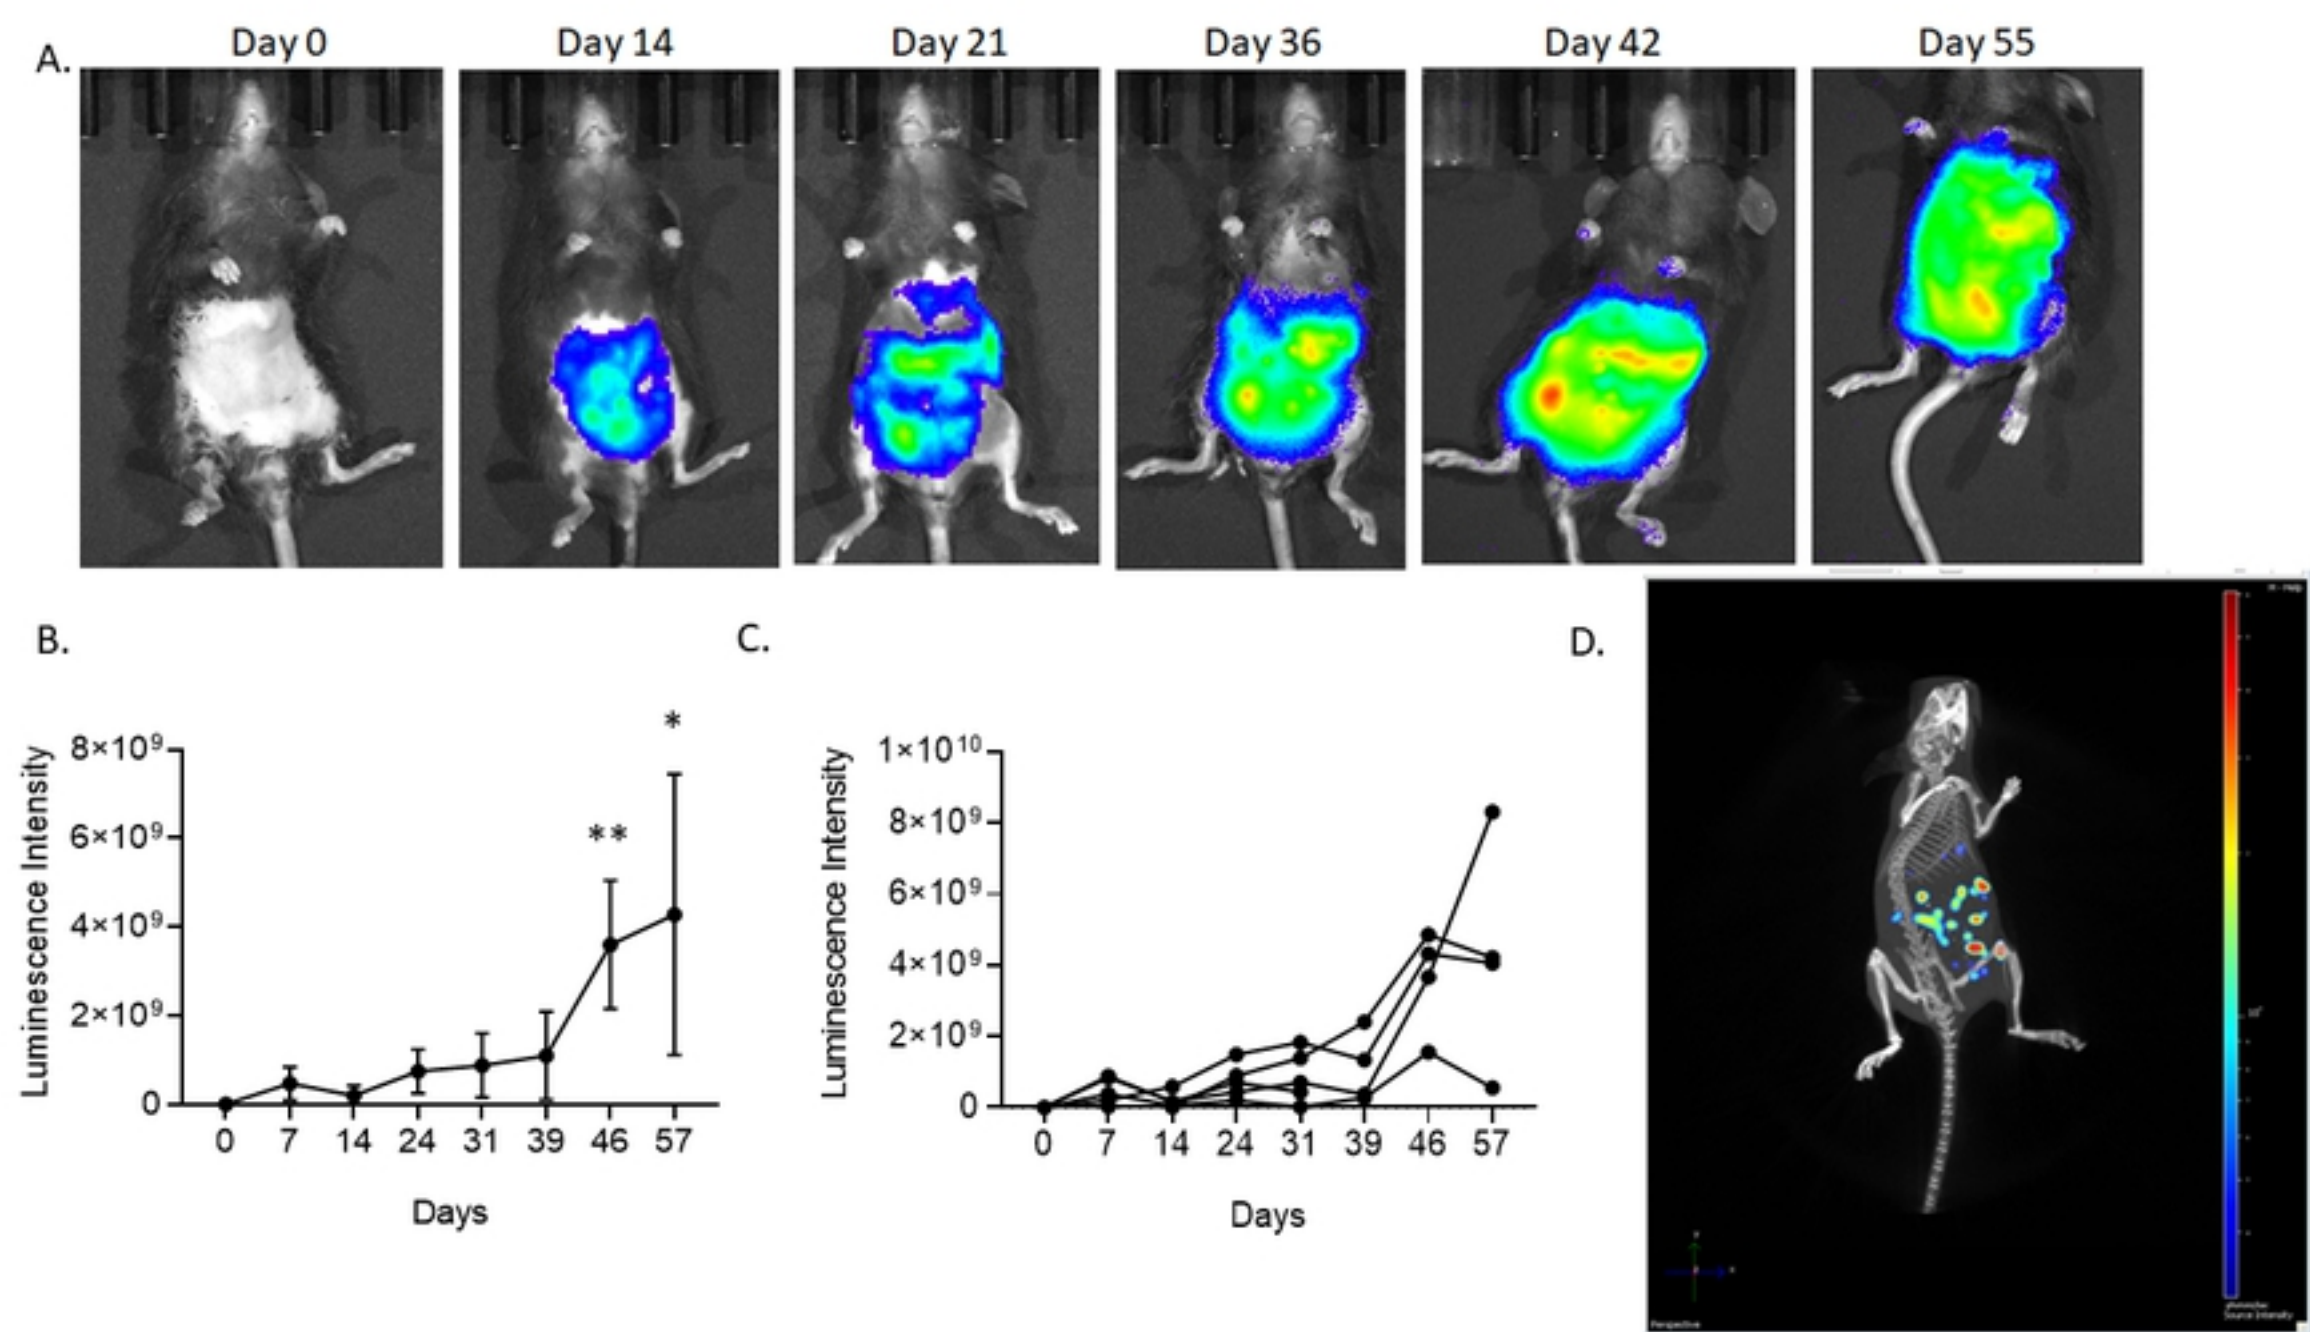

Figure 3

A.

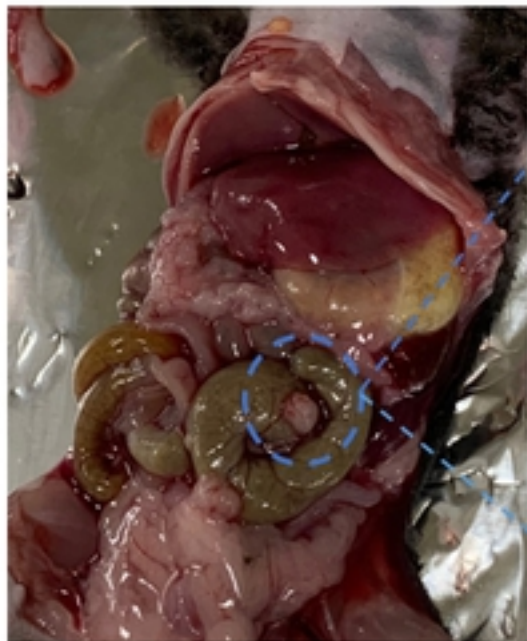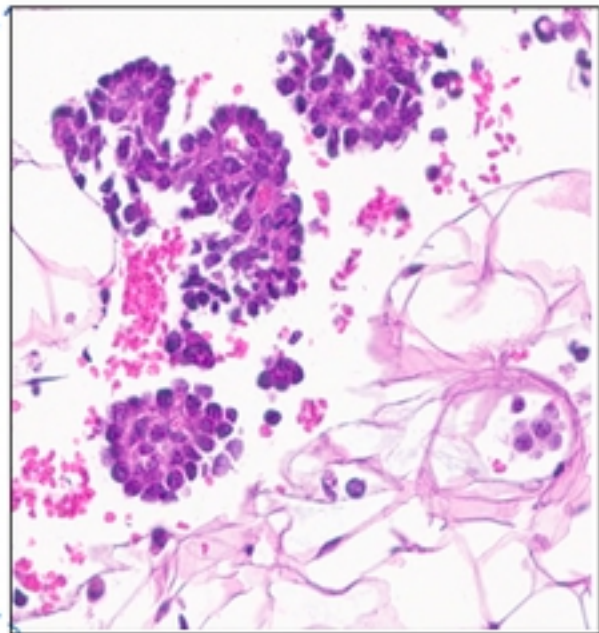

B.

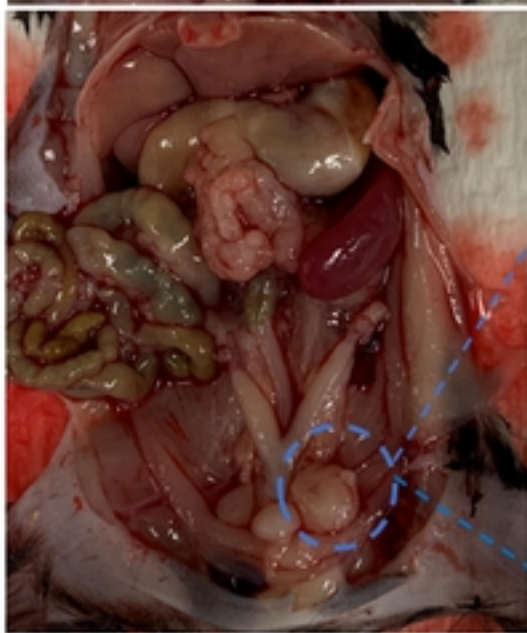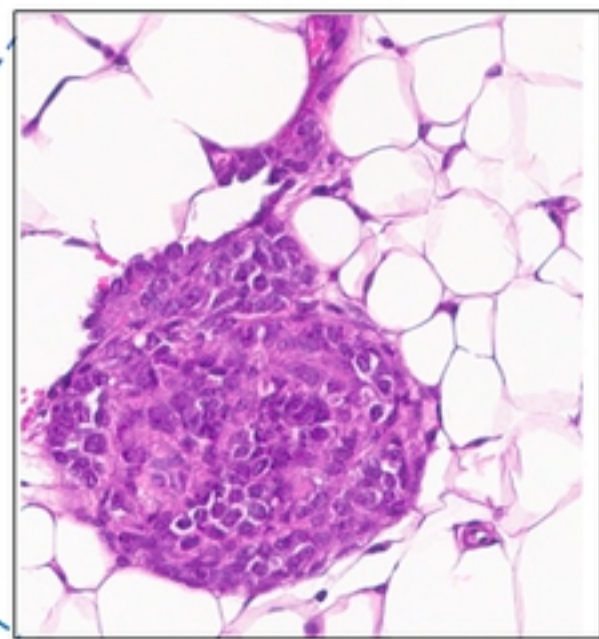

Figure 4

A.

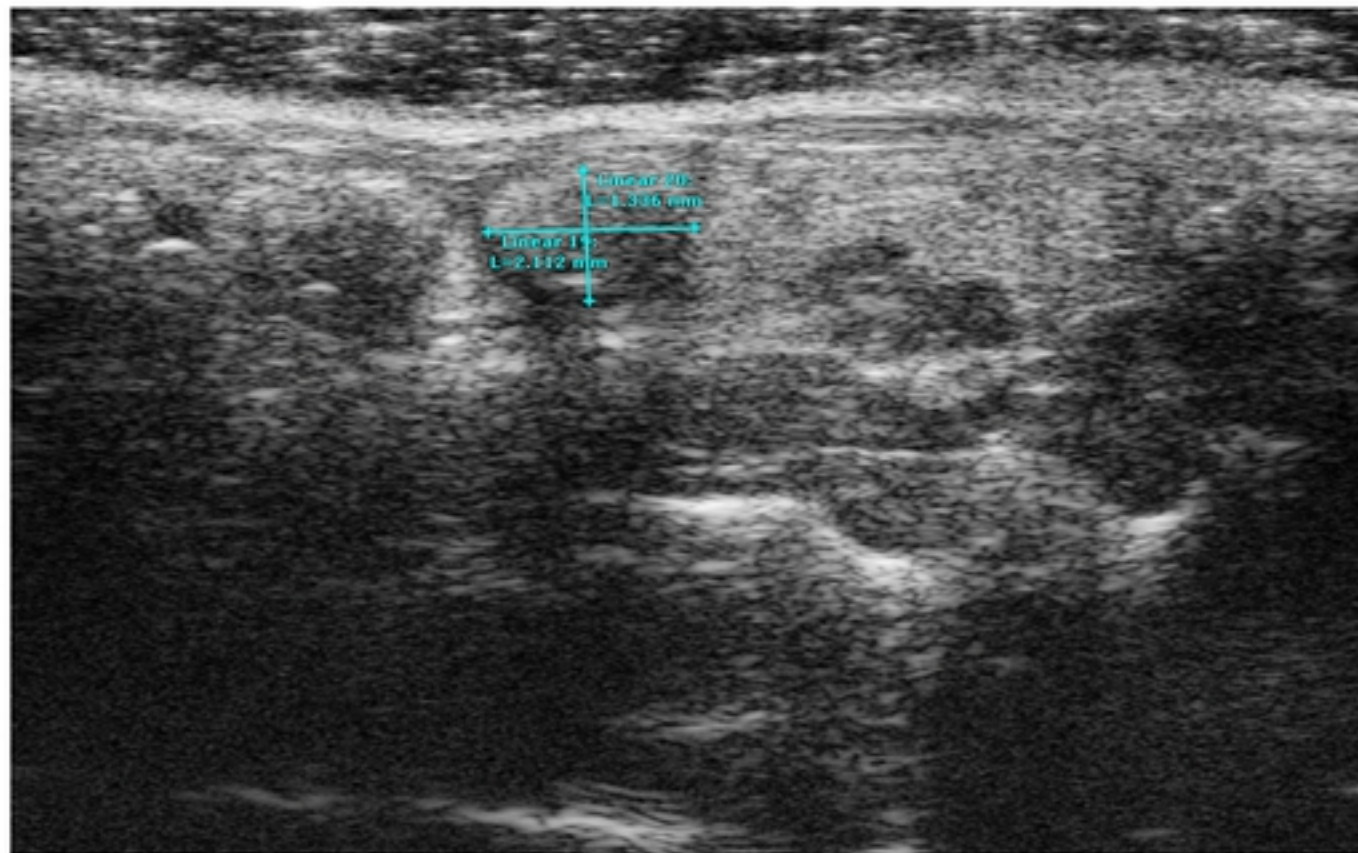

Figure 5
